# Supplementary material
Source: MDPI journal article supplement (https://www.mdpi.com/2075-4701/10/4/485)
Supplement: s1 [file s1]

Article

# Platinum Group Elements Recovery from Used Catalytic Converters by Acidic Fusion and Leaching

Erik Prasetyo <sup>1,\*</sup> and Corby Anderson <sup>2</sup>

<sup>1</sup> Indonesian Institute of Sciences, Research Unit for Mineral Technology, Jl. Ir. Sutami km. 15 Tanjung Bintang, Lampung Selatan 35361, Indonesia

<sup>2</sup> Colorado School of Mines, George Ansell Dept. of Metallurgical and Materials Engineering, Kroll Institute for Extractive Metallurgy, Mining Engineering Department, 1500 Illinois St, Golden, 80401 CO, USA; cganders@mines.edu

\* Correspondence: erik.prasetyo@lipi.go.id; Tel.: +62-721-350-054

Received: 21 March 2020; Accepted: 1 April 2020; Published: date

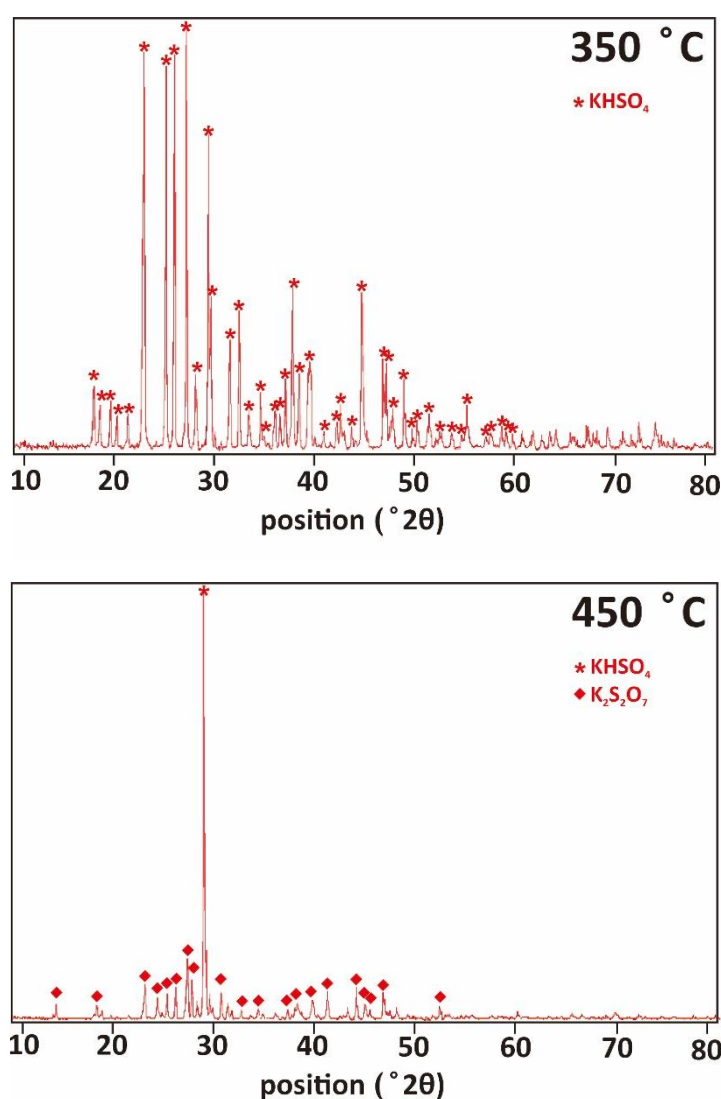

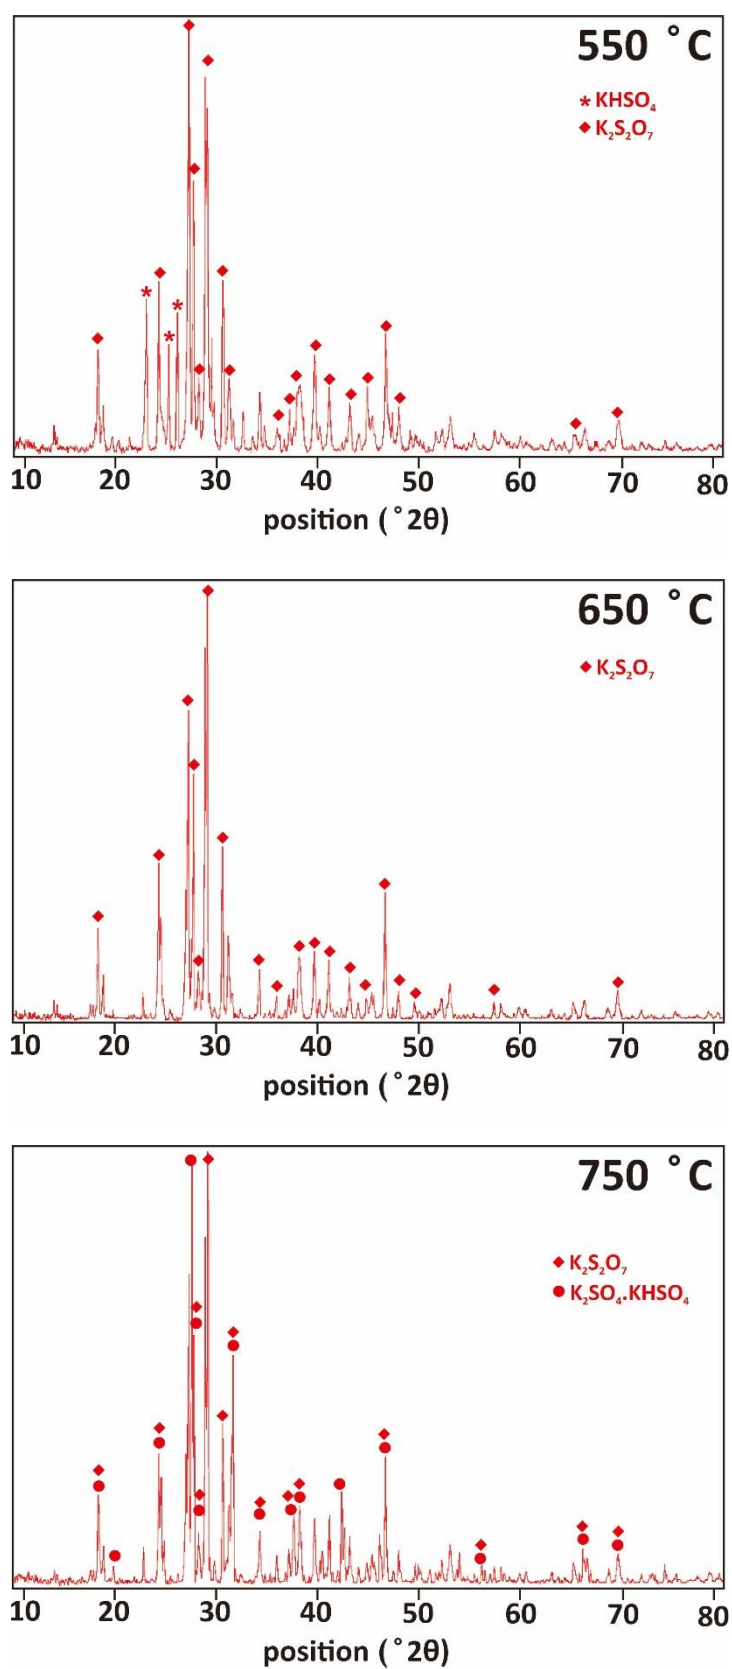

Figure 1. XRD profile obtained from heated  $\text{KHSO}_4$  powder at 350, 450, 550, 650 and 750 °C.
